# Supplementary material for: Detection of large-scale cloud microphysical changes within a major shipping corridor after implementation of the International Maritime Organization 2020 fuel sulfur regulations
Source: Copernicus journal article supplement (doi:10.5194/acp-23-8259-2023), 2023-07-25
Supplement: Supplementary file 1 [file acp-23-8259-2023-supplement.pdf]

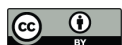

*Supplement of*

## **Detection of large-scale cloud microphysical changes within a major shipping corridor after implementation of the International Maritime Organization 2020 fuel sulfur regulations**

**Michael S. Diamond**

*Correspondence to:* Michael S. Diamond ([msdiamond@fsu.edu](mailto:msdiamond@fsu.edu))

The copyright of individual parts of the supplement might differ from the article licence.

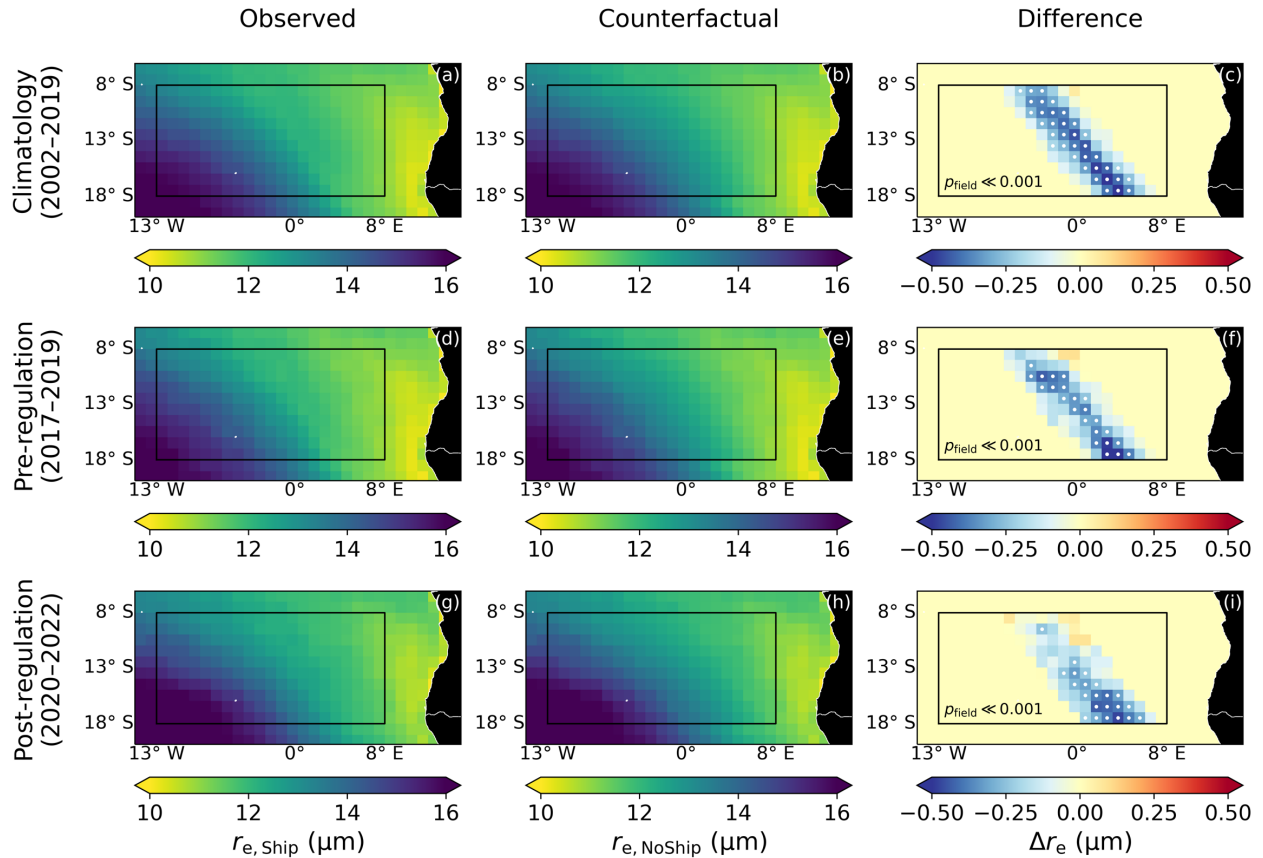

**Figure S1.** Maps of factual (observed) and counterfactual values and their difference for the annual mean liquid cloud droplet effective radius for the pre-2020 climatology (a–c), the immediately pre-regulation 3-year period 2017–2019 (d–f), and the immediate post-regulation 3-year period 2020–2022 (g–i). The analysis domain of 18° S to 8° S, 13° W to 8° E is outlined in black. Grid points for which the observed values fall outside the 95% confidence interval obtained via kriging are indicated by white dots and the corresponding field significance values are reported in (c,f,i).

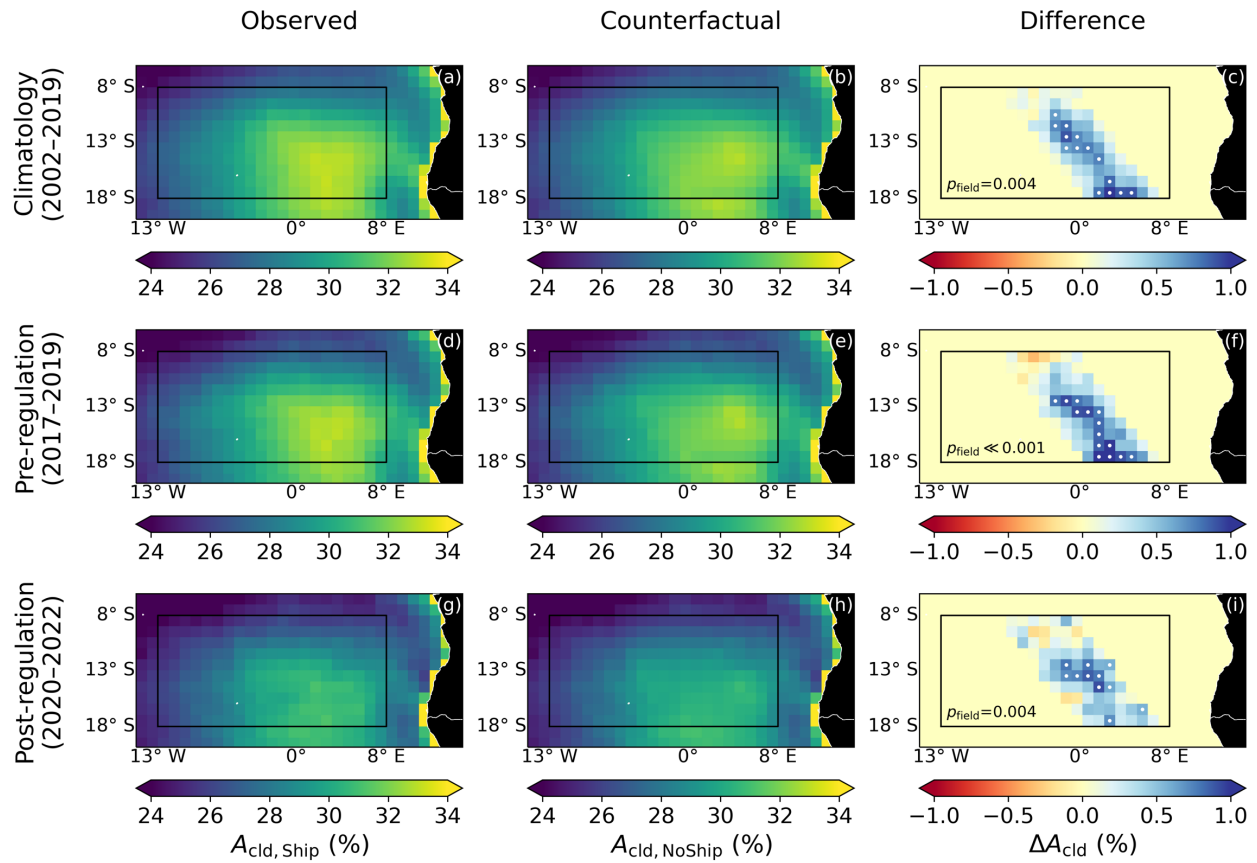

**Figure S2.** As in Figure S1, but for the annual mean overcast albedo.

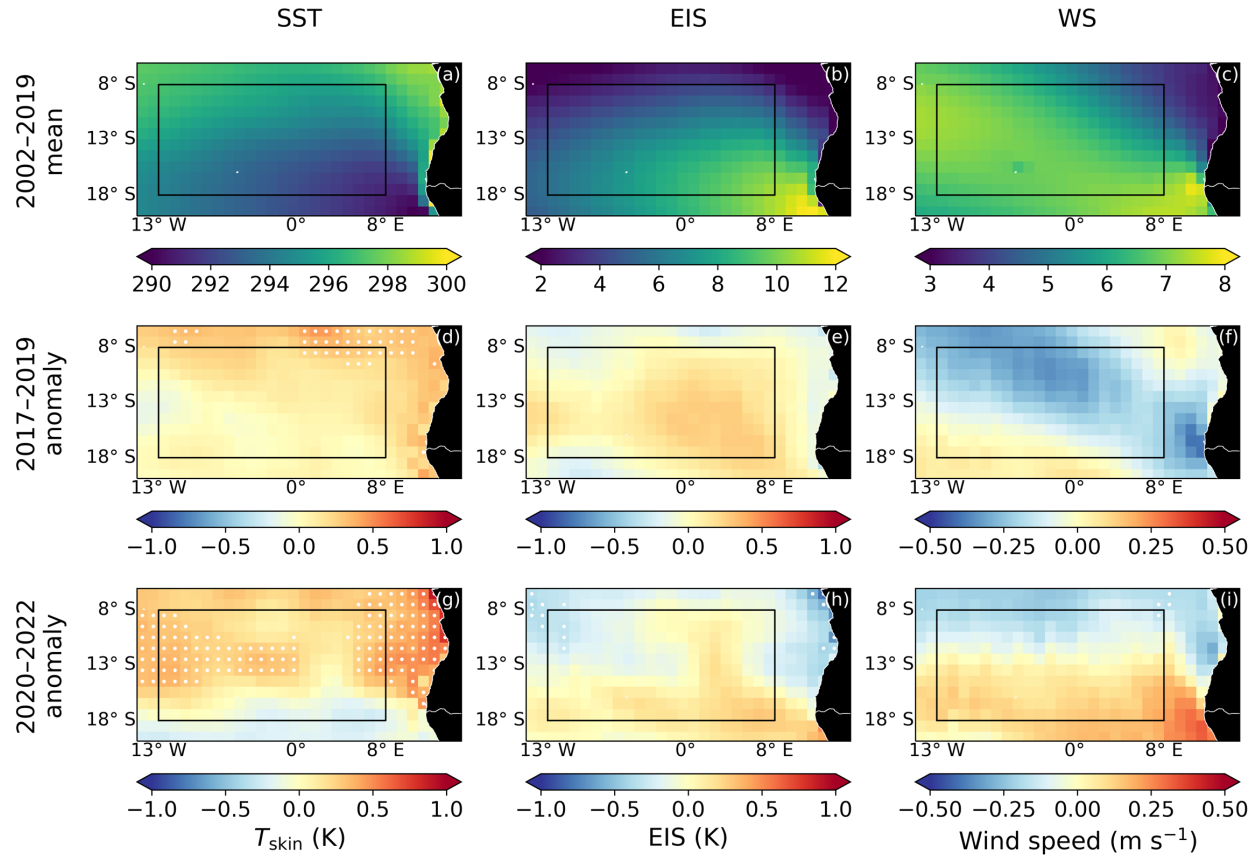

**Figure S3.** Maps of austral spring surface skin temperature (SST), estimated inversion strength (EIS), and wind speed (WS) mean values for the pre-2020 climatology (a–c) and anomalies from the 2002–2019 mean for 2017–2019 (d–f) and 2020–2022 (g–i). The analysis domain of 18° S to 8° S, 13° W to 8° E is outlined in black. Grid points for which the anomaly magnitudes exceed two standard deviations of the set of 2002–2004, 2005–2007, 2008–2010, 2011–2013, 2014–2016, and 2017–2019 mean values are indicated by white dots in (d–i).

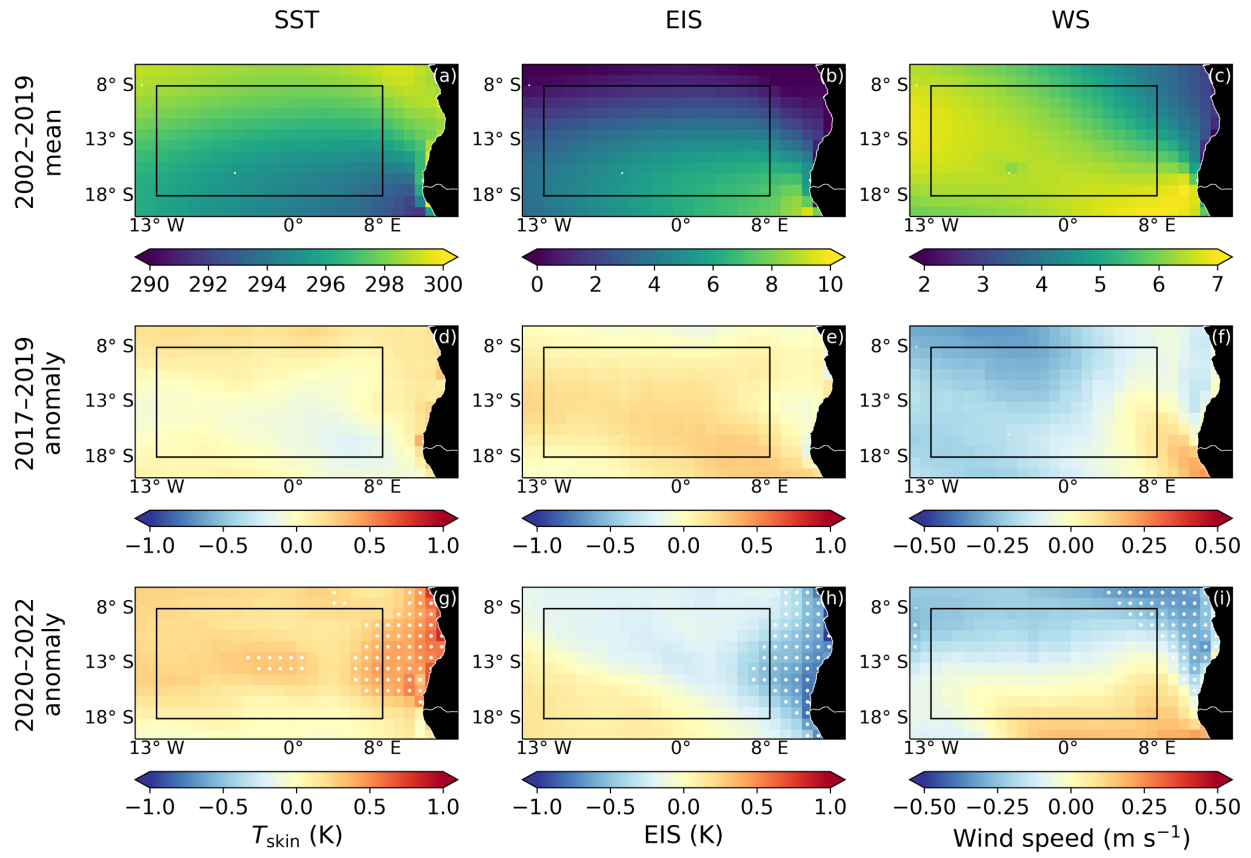

**Figure S4.** As in Figure S3, but for the annual mean surface skin temperature, estimated inversion strength, and wind speed.

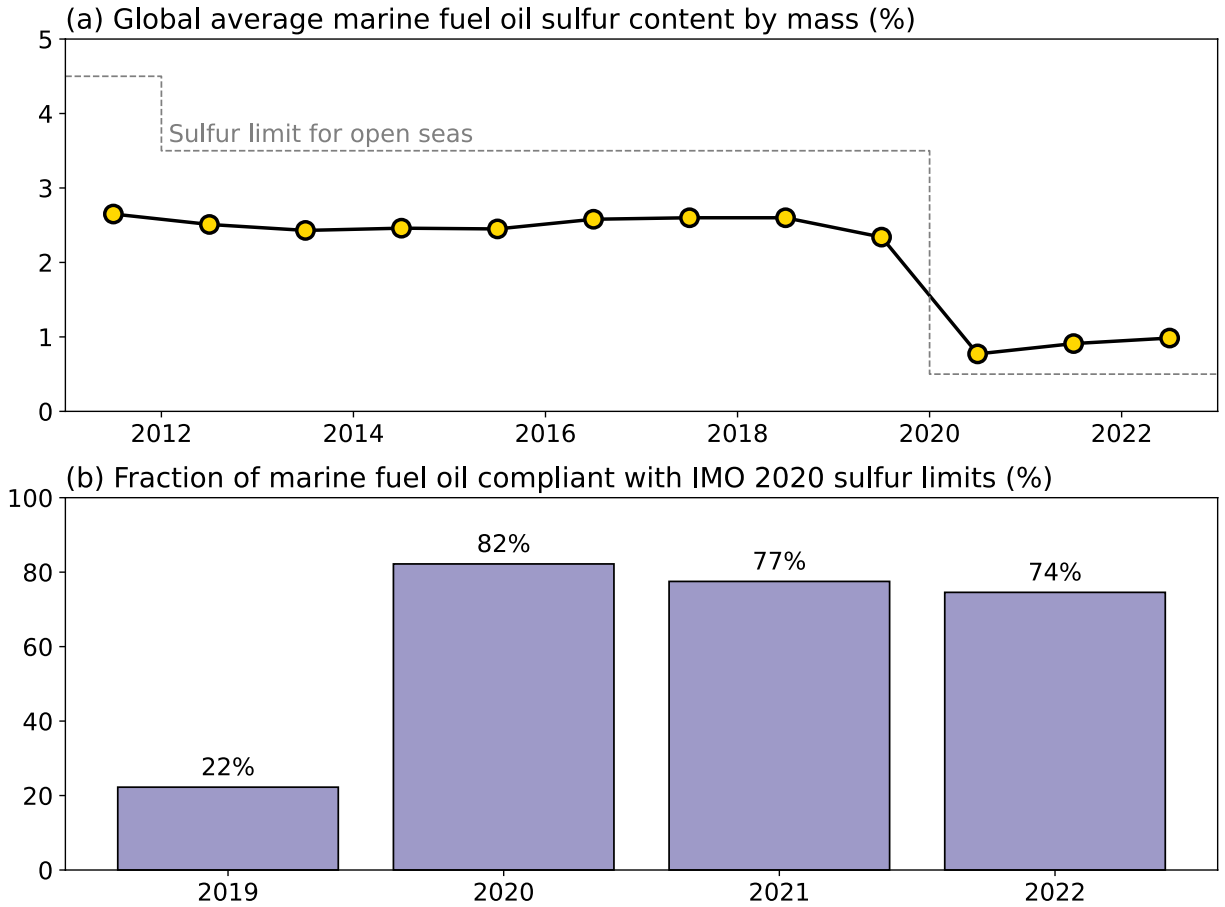

**Figure S5.** Marine fuel oil statistics (combined residual and distillate) — compiled by Lloyd's Register EMEA, Veritas Petroleum Services B.V., and Viswa Lab and reported to the IMO MEPC — shown as annual global averages of sulfur mass content for marine fuel oils (a) and the percentage of marine fuel oils, by mass, below 0.5% sulfur mass content (b). The sulfur limit for open seas is shown as a gray dotted line in (a) for reference.

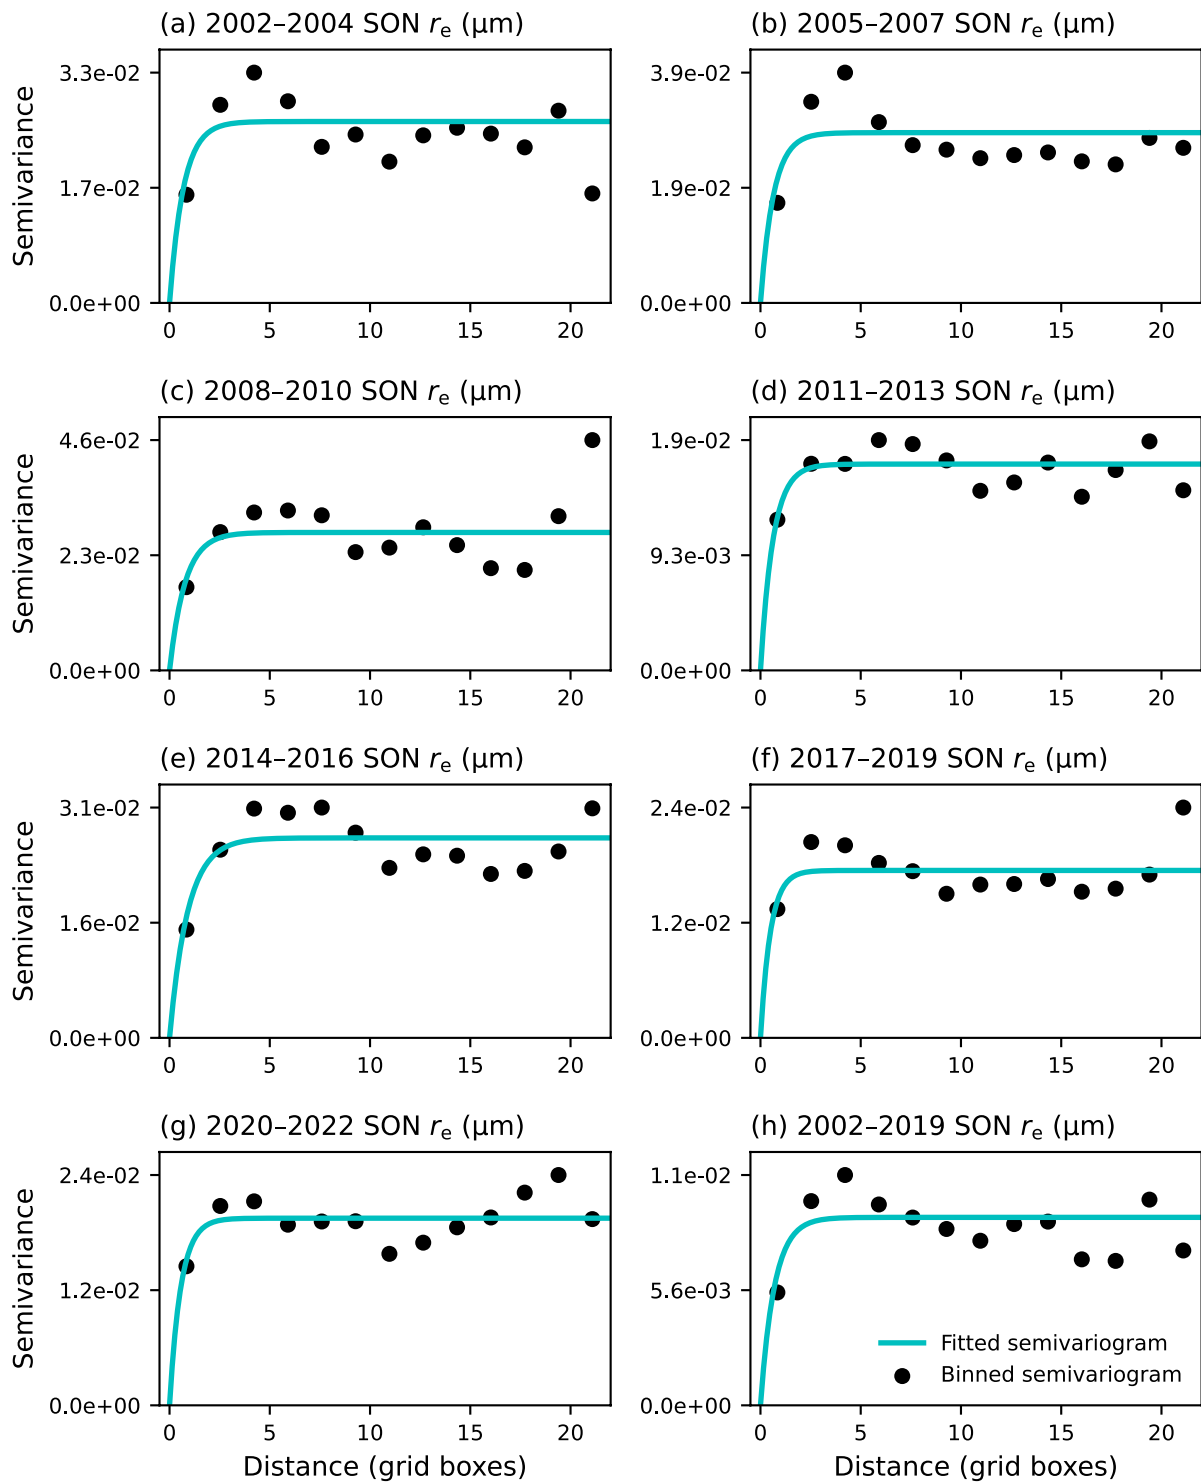

**Figure S6.** Semivariograms for austral spring liquid cloud effective radius.

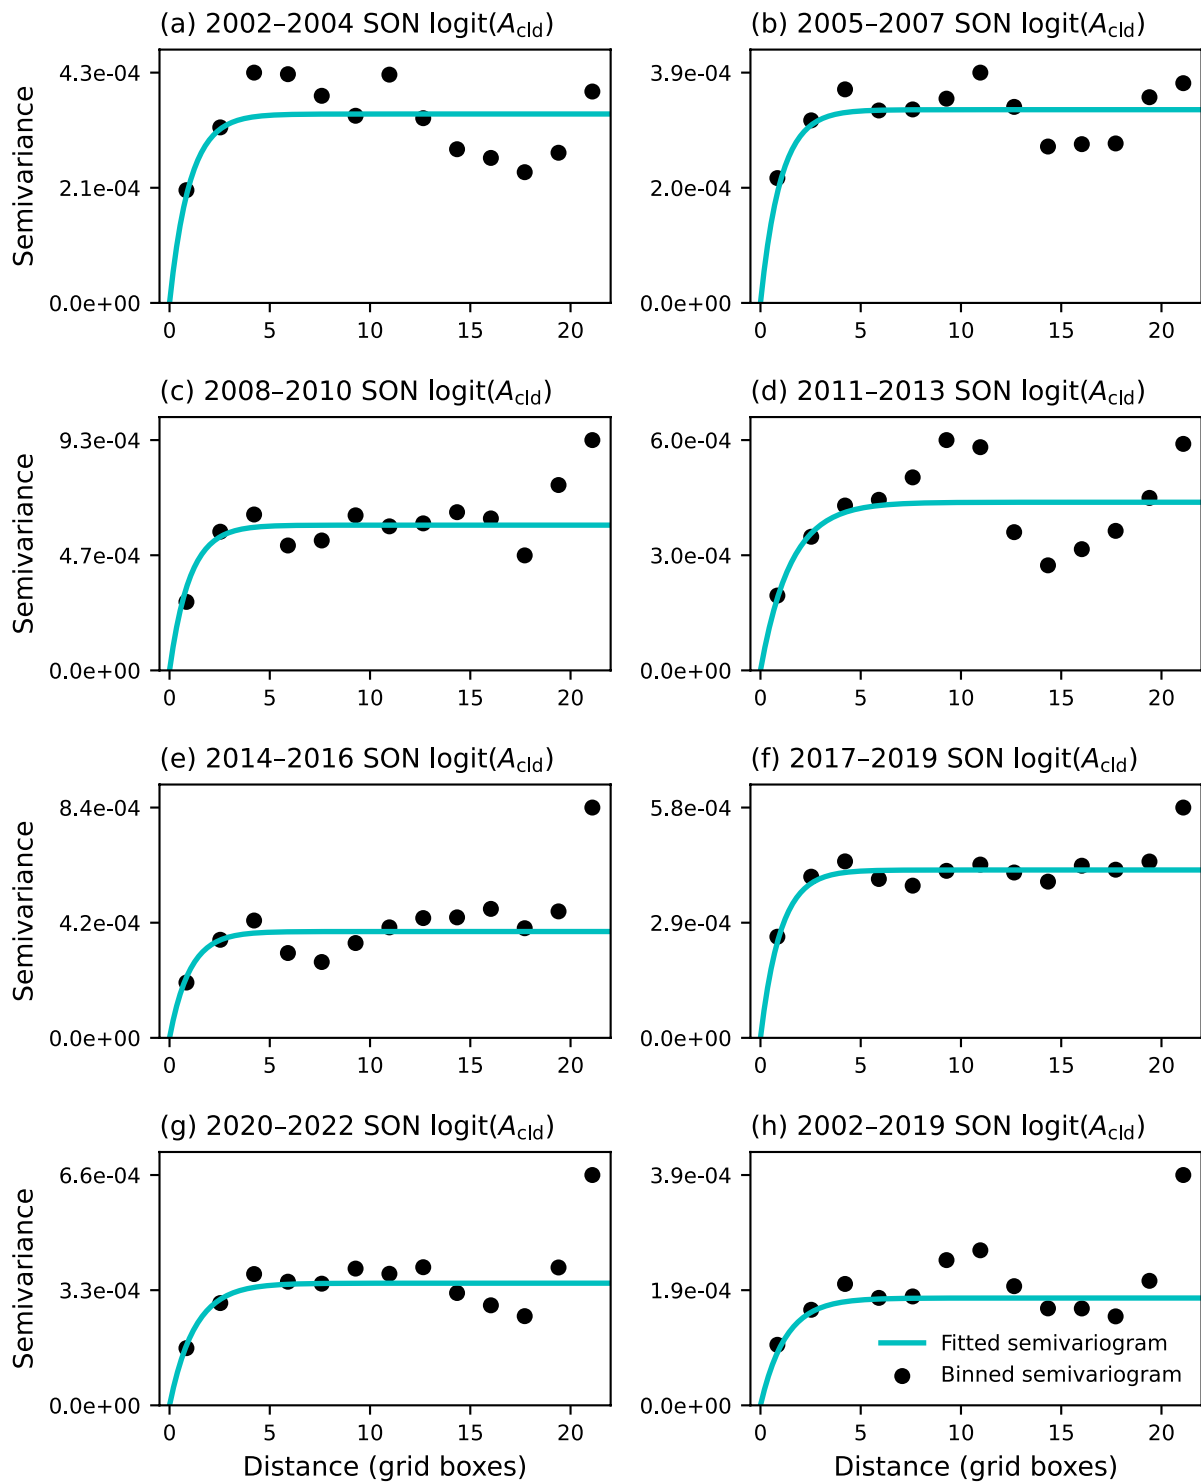

**Figure S7.** Semivariograms for austral spring overcast albedo.



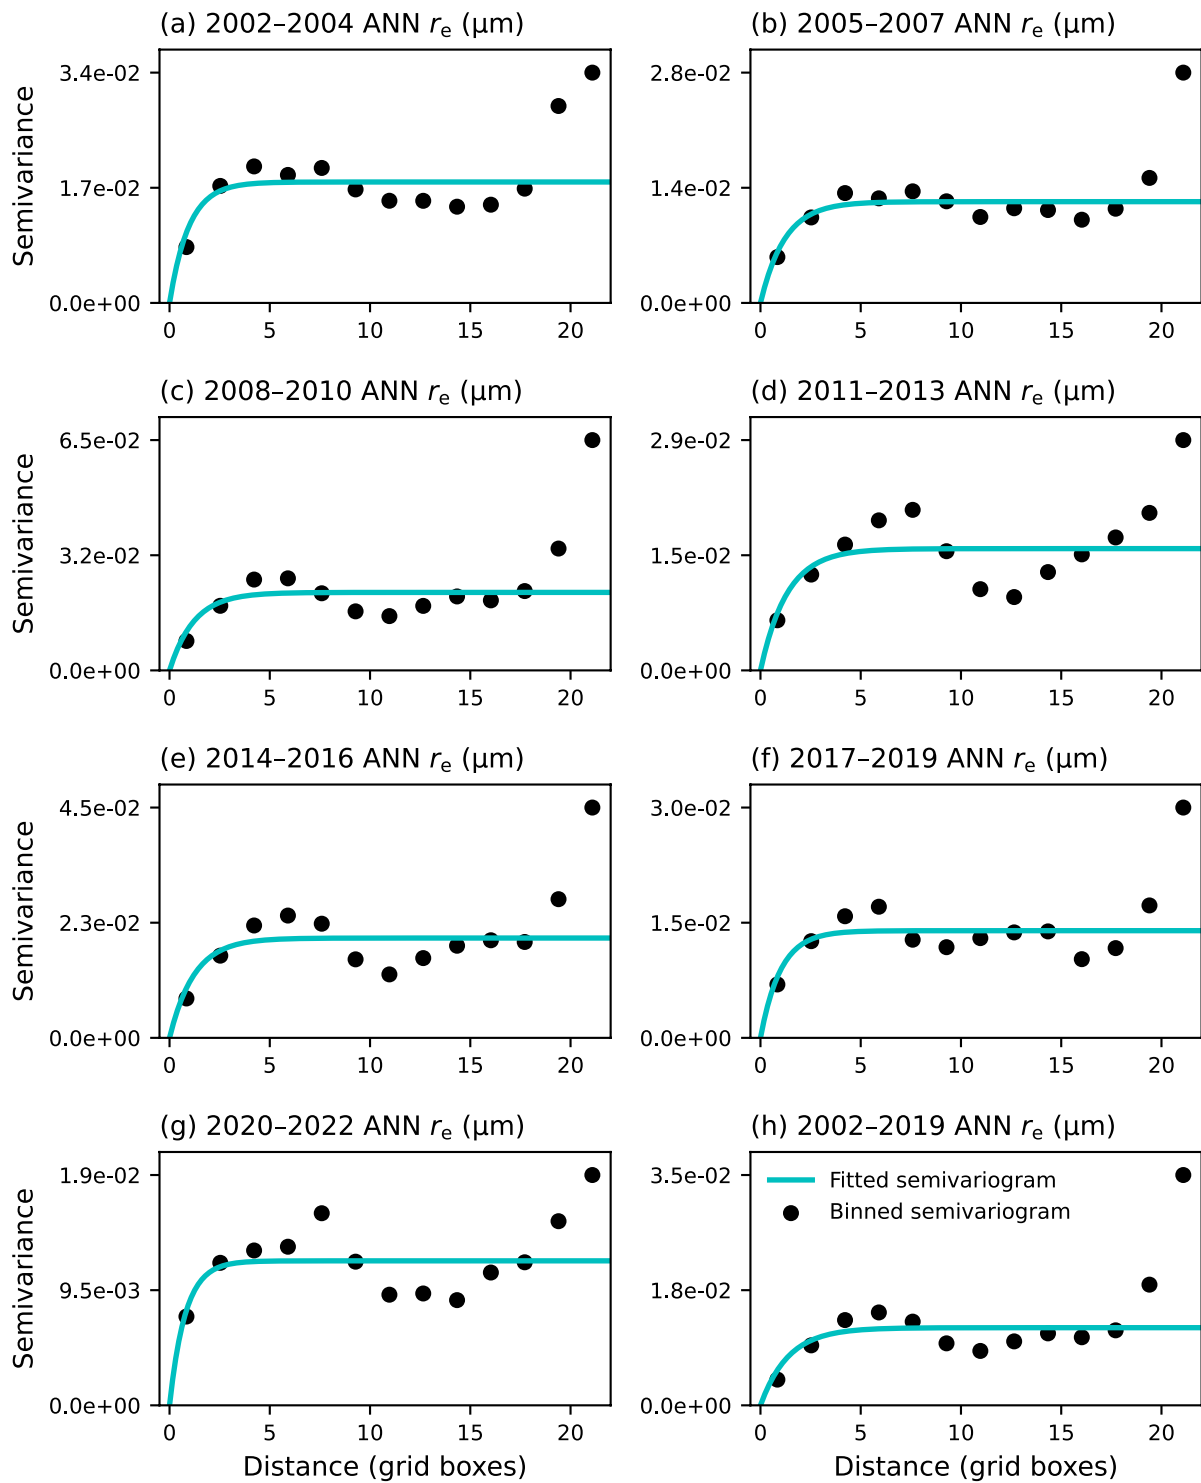

**Figure S8.** Semivariograms for annual mean liquid cloud effective radius.

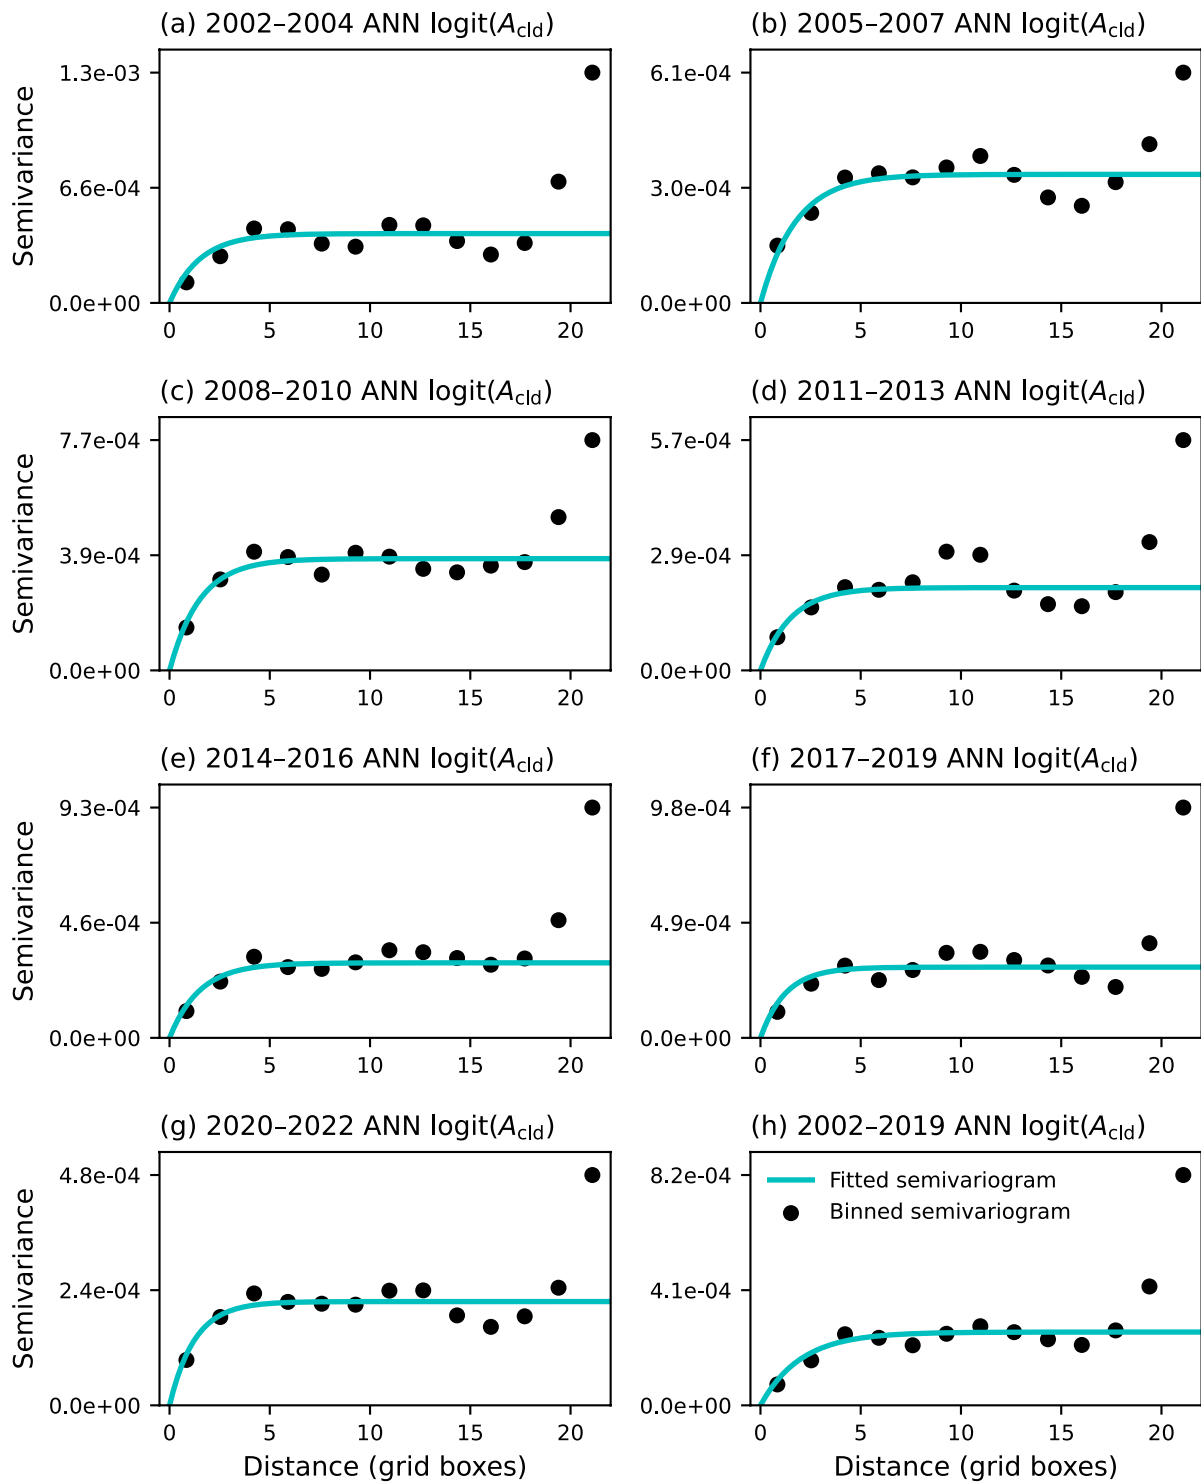

**Figure S9.** Semivariograms for annual mean overcast albedo.

**Table S1.** Summary of statistics (mean Ship value, absolute and relative Ship-NoShip difference, and field significance) and regressors used for the mean function in the kriging implementation (as selected via minimization of the Bayesian information criterion) for austral spring and annual mean values of the liquid cloud droplet effective radius and overcast albedo fields.

| Years                                                                  | Mean Ship | Absolute Ship-NoShip difference | Relative Ship-NoShip difference (%) | Field significance | Regressors used                                                       |
|------------------------------------------------------------------------|-----------|---------------------------------|-------------------------------------|--------------------|-----------------------------------------------------------------------|
| Austral spring liquid cloud droplet effective radius ( $\mu\text{m}$ ) |           |                                 |                                     |                    |                                                                       |
| 2002–2004                                                              | 12.02     | -0.37 (-0.48 to -0.26)          | -3.0 (-4.0 to -2.1)                 | < 0.0001           | lon, lon <sup>2</sup> , lat <sup>2</sup> , lon*lat                    |
| 2005–2007                                                              | 12.54     | -0.56 (-0.67 to -0.45)          | -4.4 (-5.3 to -3.5)                 | < 0.0001           | WS, lon, lon <sup>2</sup> , lat, lat <sup>2</sup> , lon*lat           |
| 2008–2010                                                              | 12.47     | -0.76 (-0.88 to -0.65)          | -6.1 (-7.1 to -5.2)                 | < 0.0001           | lon, lon <sup>2</sup> , lat, lat <sup>2</sup> , lon*lat               |
| 2011–2013                                                              | 12.57     | -0.62 (-0.70 to -0.54)          | -4.9 (-5.6 to -4.3)                 | < 0.0001           | EIS, WS, lon <sup>2</sup> , lat, lat <sup>2</sup> , lon*lat           |
| 2014–2016                                                              | 12.37     | -0.49 (-0.62 to -0.37)          | -4.0 (-5.0 to -3.0)                 | < 0.0001           | EIS, WS, lon, lon <sup>2</sup> , lat, lat <sup>2</sup> , lon*lat      |
| 2017–2019                                                              | 12.44     | -0.46 (-0.54 to -0.38)          | -3.7 (-4.3 to -3.1)                 | < 0.0001           | EIS, WS, lon <sup>2</sup> , lat, lat <sup>2</sup> , lon*lat           |
| 2020–2022                                                              | 13.14     | -0.16 (-0.25 to -0.08)          | -1.3 (-1.9 to -0.6)                 | 0.00197            | SST, lon, lon <sup>2</sup> , lat, lat <sup>2</sup> , lon*lat          |
| 2002–2019                                                              | 12.40     | -0.56 (-0.63 to -0.50)          | -4.5 (-5.1 to -4.0)                 | < 0.0001           | SST, WS, lon, lon <sup>2</sup> , lat, lat <sup>2</sup> , lon*lat      |
| Austral spring overcast albedo (%)                                     |           |                                 |                                     |                    |                                                                       |
| 2002–2004                                                              | 35.71     | 0.61 (0.26 to 0.95)             | 1.7 (0.7 to 2.7)                    | 0.00056            | SST, EIS, WS, lon <sup>2</sup> , lat, lat <sup>2</sup>                |
| 2005–2007                                                              | 36.78     | 1.10 (0.75 to 1.43)             | 3.0 (2.0 to 3.9)                    | < 0.0001           | SST, EIS, WS, lon, lon <sup>2</sup> , lat <sup>2</sup> , lon*lat      |
| 2008–2010                                                              | 36.13     | 1.12 (0.68 to 1.55)             | 3.1 (1.9 to 4.3)                    | < 0.0001           | SST, EIS, lon, lon <sup>2</sup> , lat <sup>2</sup>                    |
| 2011–2013                                                              | 37.00     | 0.85 (0.42 to 1.28)             | 2.3 (1.1 to 3.5)                    | < 0.0001           | SST, EIS, WS, lon <sup>2</sup> , lon*lat                              |
| 2014–2016                                                              | 36.24     | 0.61 (0.23 to 0.98)             | 1.7 (0.6 to 2.7)                    | 0.00356            | SST, WS, lon, lon <sup>2</sup> , lat, lat <sup>2</sup> , lon*lat      |
| 2017–2019                                                              | 35.12     | 0.83 (0.44 to 1.22)             | 2.4 (1.3 to 3.5)                    | < 0.0001           | SST, EIS, WS, lon, lon <sup>2</sup> , lat, lat <sup>2</sup> , lon*lat |
| 2020–2022                                                              | 34.79     | 0.36 (-0.004 to 0.71)           | 1.0 (-0.01 to 2.1)                  | 0.00375            | WS, lon <sup>2</sup> , lat, lat <sup>2</sup> , lon*lat                |
| 2002–2019                                                              | 36.16     | 0.78 (0.52 to 1.04)             | 2.1 (1.4 to 2.9)                    | < 0.0001           | SST, EIS, WS, lon, lon <sup>2</sup> , lat, lon*lat                    |
| Annual mean liquid cloud droplet effective radius ( $\mu\text{m}$ )    |           |                                 |                                     |                    |                                                                       |
| 2002–2004                                                              | 12.02     | -0.40 (-0.50 to -0.29)          | -3.3 (-4.2 to -2.4)                 | < 0.0001           | WS, lon <sup>2</sup> , lat <sup>2</sup> , lon*lat                     |
| 2005–2007                                                              | 12.25     | -0.42 (-0.51 to -0.32)          | -3.4 (-4.2 to -2.6)                 | < 0.0001           | SST, lon <sup>2</sup> , lat, lat <sup>2</sup> , lon*lat               |
| 2008–2010                                                              | 12.32     | -0.37 (-0.50 to -0.25)          | -3.0 (-4.0 to -2.0)                 | < 0.0001           | SST, EIS, WS, lon, lon <sup>2</sup> , lon*lat                         |
| 2011–2013                                                              | 12.21     | -0.39 (-0.50 to -0.28)          | -3.2 (-4.1 to -2.3)                 | < 0.0001           | EIS, WS, lon, lon <sup>2</sup> , lat, lon*lat                         |
| 2014–2016                                                              | 12.33     | -0.38 (-0.50 to -0.26)          | -3.1 (-4.1 to -2.1)                 | < 0.0001           | WS, lon, lon <sup>2</sup> , lat, lat <sup>2</sup> , lon*lat           |
| 2017–2019                                                              | 12.08     | -0.31 (-0.39 to -0.22)          | -2.5 (-3.2 to -1.8)                 | < 0.0001           | SST, EIS, WS, lon, lat <sup>2</sup> , lon*lat                         |
| 2020–2022                                                              | 12.51     | -0.24 (-0.32 to -0.17)          | -1.9 (-2.6 to -1.3)                 | < 0.0001           | EIS, WS, lon, lat, lat <sup>2</sup> , lon*lat                         |
| 2002–2019                                                              | 12.20     | -0.37 (-0.47 to -0.28)          | -3.1 (-3.8 to -2.3)                 | < 0.0001           | EIS, WS, lon, lon <sup>2</sup> , lat, lon*lat                         |
| Annual mean overcast albedo (%)                                        |           |                                 |                                     |                    |                                                                       |
| 2002–2004                                                              | 31.72     | 0.60 (0.23 to 0.96)             | 1.9 (0.7 to 3.0)                    | 0.05960            | EIS, lon, lon <sup>2</sup> , lat, lat <sup>2</sup> , lon*lat          |
| 2005–2007                                                              | 31.89     | 0.67 (0.33 to 1.01)             | 2.1 (1.0 to 3.2)                    | 0.00179            | SST, EIS, WS, lon, lon <sup>2</sup>                                   |
| 2008–2010                                                              | 30.79     | 0.59 (0.23 to 0.96)             | 1.9 (0.8 to 3.1)                    | 0.02622            | SST, EIS, WS, lon, lon <sup>2</sup> , lon*lat                         |
| 2011–2013                                                              | 31.68     | 0.52 (0.25 to 0.79)             | 1.6 (0.8 to 2.5)                    | < 0.0001           | SST, lon, lon <sup>2</sup> , lat, lat <sup>2</sup> , lon*lat          |
| 2014–2016                                                              | 31.43     | 0.68 (0.36 to 1.00)             | 2.2 (1.1 to 3.2)                    | 0.00029            | SST, lon, lon <sup>2</sup> , lat, lat <sup>2</sup> , lon*lat          |
| 2017–2019                                                              | 30.98     | 0.54 (0.23 to 0.85)             | 1.8 (0.7 to 2.7)                    | 0.0008             | lon, lon <sup>2</sup> , lat, lat <sup>2</sup> , lon*lat               |
| 2020–2022                                                              | 29.33     | 0.38 (0.12 to 0.62)             | 1.3 (0.4 to 2.1)                    | 0.00427            | SST, EIS, WS, lon, lon <sup>2</sup> , lat, lat <sup>2</sup> , lon*lat |
| 2002–2019                                                              | 31.41     | 0.56 (0.26 to 0.85)             | 1.8 (0.8 to 2.7)                    | 0.00366            | SST, EIS, lon <sup>2</sup> , lat, lat <sup>2</sup> , lon*lat          |

**Table S2.** Percentiles of the estimated reduction in shipping effects after the implementation of the marine fuel sulfur regulations in 2020, as measured by the ratio of the 2020-2022 relative Ship-NoShip difference to the climatological 2002–2019 value for the austral spring (SON) and annual mean (ANN) liquid cloud droplet effective radius ( $r_e$ ) and overcast albedo ( $A_{\text{cld}}$ ) fields. Values are emboldened to indicate whether the ratios show statistically significant decreases at different thresholds (50<sup>th</sup> for median value only, 25<sup>th</sup>-75<sup>th</sup> for interquartile range, 5<sup>th</sup>-95<sup>th</sup> for 90% confidence, 2.5<sup>th</sup>-97.5<sup>th</sup> for 95% confidence, and 0.5<sup>th</sup>-99.5<sup>th</sup> for 99% confidence interval).

| Variable             | Percentile of 2020–2022 relative difference over 2002–2019 value ratio |                   |                 |                  |                  |                  |                  |                    |                    |
|----------------------|------------------------------------------------------------------------|-------------------|-----------------|------------------|------------------|------------------|------------------|--------------------|--------------------|
|                      | 0.5 <sup>th</sup>                                                      | 2.5 <sup>th</sup> | 5 <sup>th</sup> | 25 <sup>th</sup> | 50 <sup>th</sup> | 75 <sup>th</sup> | 95 <sup>th</sup> | 97.5 <sup>th</sup> | 99.5 <sup>th</sup> |
| SON $r_e$            | <b>0.09</b>                                                            | <b>0.13</b>       | <b>0.15</b>     | <b>0.23</b>      | <b>0.27</b>      | <b>0.33</b>      | <b>0.41</b>      | <b>0.43</b>        | <b>0.48</b>        |
| SON $A_{\text{cld}}$ | -0.18                                                                  | -0.01             | <b>0.08</b>     | <b>0.31</b>      | <b>0.48</b>      | <b>0.66</b>      | <b>0.97</b>      | 1.08               | 1.38               |
| ANN $r_e$            | 0.36                                                                   | <b>0.41</b>       | <b>0.44</b>     | <b>0.55</b>      | <b>0.64</b>      | <b>0.73</b>      | <b>0.89</b>      | <b>0.95</b>        | 1.07               |
| ANN $A_{\text{cld}}$ | 0.06                                                                   | 0.22              | 0.29            | <b>0.53</b>      | <b>0.72</b>      | <b>0.96</b>      | 1.50             | 1.76               | 2.57               |
